# Supplementary material for: A Combined Systemic Strategy for Overcoming Cisplatin Resistance in Head and Neck Cancer: From Target Identification to Drug Discovery
Source: PubMed Central journal article supplement (PMC7700594; doi:10.3390/cancers12113482), 2020-11-23
Supplement: cancers-12-03482-s001.pdf [file cancers-12-03482-s001.pdf]

## Supplementary Materials

# A combined systemic strategy for overcoming cisplatin resistance in head and neck cancer: from target identification to drug discovery

Yin-Ju Chen, Guo-Rung You, Meng-Yu Lai, Long-Sheng Lu, Chang-Yu Chen, Lai-Lei Ting, Hsin-Lun Lee, Yazuka Kanno, Jeng-Fong Chiou and Ann-Joy Cheng

Immunoblot show in Figure 1C.

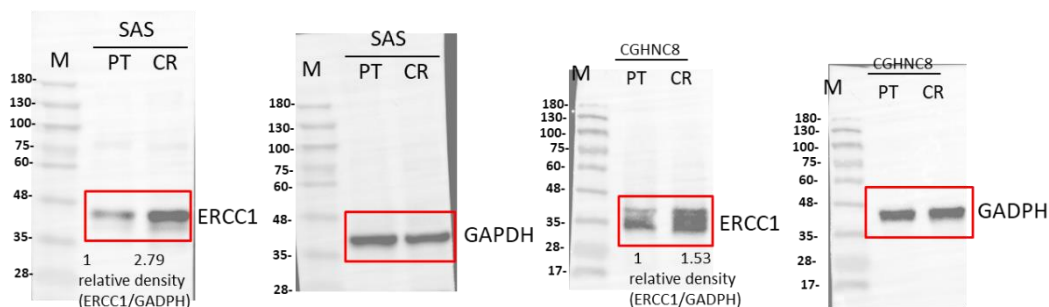

Immunoblot show in Figure 2.

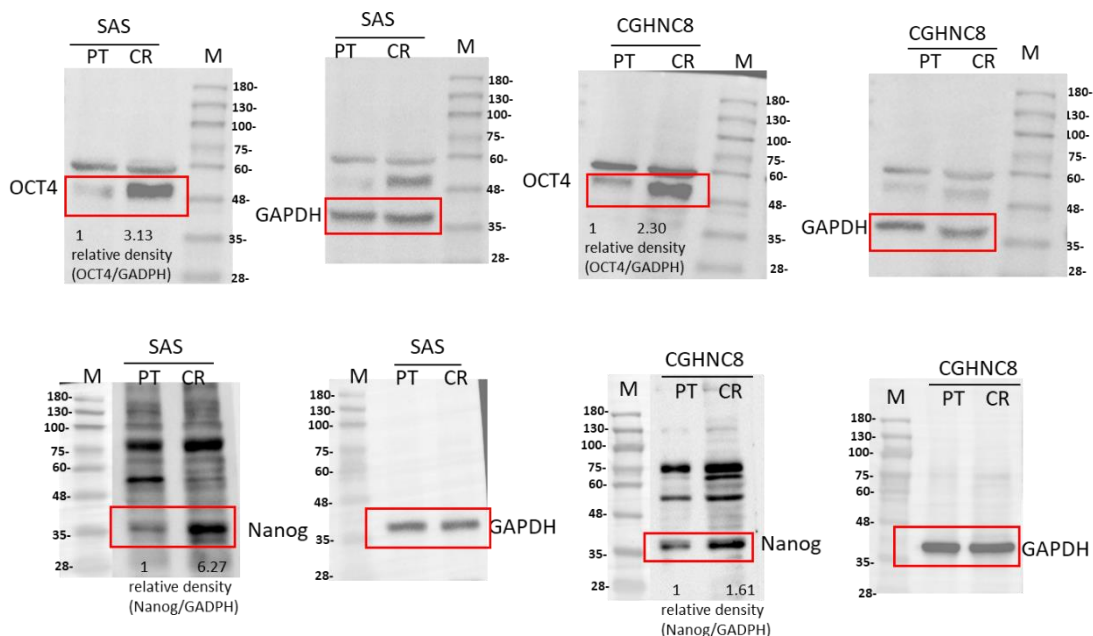

Immunoblot show in Figure 6.

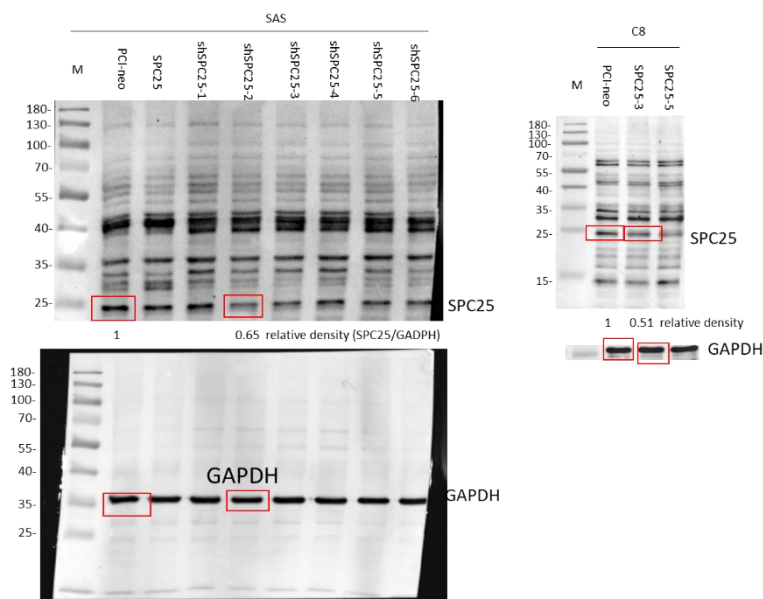

**Figure 1.** Original immunoblotting images presented in the paper.

**Table 1.** Information of top 100 genes up-regulation in the CR cells. The average fold change and *p*-value were listed.

| Gene Symbol | Gene Name                                          | Fold change | <i>p</i> -Value |
|-------------|----------------------------------------------------|-------------|-----------------|
| HIGD2A      | HIG1 domain family, member 2A                      | 4.57        | 6.29E-04        |
| TUBA1B      | Tubulin, alpha 1b                                  | 3.98        | 1.41E-02        |
| SLC25A33    | Solute carrier family 25, member 33                | 3.62        | 4.43E-02        |
| PROS1       | Protein S (alpha)                                  | 3.25        | 2.29E-02        |
| ULBP1       | UL16 binding protein 1                             | 3.17        | 4.83E-02        |
| ETV1        | Ets variant 1                                      | 3.15        | 6.45E-03        |
| KITLG       | KIT ligand                                         | 3.03        | 1.54E-02        |
| RAP1B       | RAP1B, member of RAS oncogene family               | 3.00        | 2.01E-02        |
| LAMA4       | Laminin, alpha 4                                   | 3.00        | 2.75E-03        |
| CCDC23      | Coiled-coil domain containing 23                   | 2.84        | 3.40E-02        |
| ZNF417      | Zinc finger protein 417                            | 2.62        | 1.22E-02        |
| TPMT        | Thiopurine S-methyltransferase                     | 2.34        | 1.38E-02        |
| RWDD2A      | RWD domain containing 2A                           | 2.32        | 1.80E-02        |
| TMEFF1      | Transmembrane protein with EGF-like and two        | 2.32        | 2.99E-02        |
| ZNF675      | Zinc finger protein 675                            | 2.31        | 9.09E-05        |
| C7orf58     | Chromosome 7 open reading frame 58                 | 2.26        | 2.39E-03        |
| UTRN        | Utrophin                                           | 2.19        | 1.28E-02        |
| MRPS18C     | Mitochondrial ribosomal protein S18C               | 2.19        | 2.55E-02        |
| MSRB3       | Methionine sulfoxide reductase B3                  | 2.15        | 3.19E-02        |
| KIAA1841    | KIAA1841                                           | 2.14        | 1.67E-02        |
| STX11       | Syntaxin 11                                        | 2.14        | 1.46E-02        |
| NEXN        | Nexilin (F actin binding protein)                  | 2.13        | 3.79E-02        |
| TTL7        | Tubulin tyrosine ligase-like family, member 7      | 2.11        | 4.82E-02        |
| NDUFA       | NADH dehydrogenase (ubiquinone) 1 alpha            | 2.11        | 1.03E-02        |
| MOP-1       | MOP-1                                              | 2.11        | 4.04E-03        |
| SPC25       | SPC25, NDC80 kinetochore complex component,        | 2.10        | 1.48E-02        |
| LSM5        | LSM5 homolog, U6 small nuclear RNA                 | 2.09        | 4.75E-02        |
| DST         | Dystonin                                           | 2.07        | 1.57E-03        |
| KRTAP4-     | Keratin associated protein 4-12                    | 2.06        | 1.81E-05        |
| EVI1        | Ecotropic viral integration site 1                 | 2.06        | 4.58E-02        |
| SERPINI     | Serpin peptidase inhibitor, clade I (neuroserpin), | 2.06        | 5.56E-03        |
| HIVEP       | Human immunodeficiency virus type I enhancer       | 2.06        | 1.47E-02        |

|          |                                                        |      |          |
|----------|--------------------------------------------------------|------|----------|
| C6orf19  | Chromosome 6 open reading frame 199                    | 2.04 | 1.67E-02 |
| PHLDB    | Pleckstrin homology-like domain, family B,             | 2.04 | 1.79E-02 |
| CAMK2    | Calcium/calmodulin-dependent protein kinase II         | 2.04 | 2.70E-02 |
| FAM36    | Family with sequence similarity 36, member A           | 2.03 | 2.26E-03 |
| C3orf10  | Chromosome 3 open reading frame 10                     | 2.02 | 3.48E-03 |
| KRCC1    | Lysine-rich coiled-coil 1                              | 2.01 | 2.18E-02 |
| DSEL     | Dermatan sulfate epimerase-like                        | 1.99 | 5.01E-03 |
| ZNF50    | Zinc finger protein 502                                | 1.99 | 4.46E-02 |
| GPR160   | G protein-coupled receptor 160                         | 1.99 | 2.72E-03 |
| RAB28    | RAB28 // RAB28, member RAS oncogene family             | 1.99 | 1.45E-02 |
| AHNAK    | AHNAK nucleoprotein 2                                  | 1.98 | 2.47E-02 |
| RHEB     | Ras homolog enriched in brain                          | 1.96 | 6.64E-03 |
| SGCB     | Sarcoglycan, beta 43kDa dystrophin-associated          | 1.96 | 2.00E-04 |
| SATB1    | SATB homeobox 1                                        | 1.96 | 1.27E-02 |
| APBB2    | Amyloid beta (A4) precursor protein-binding, family B, | 1.95 | 2.22E-05 |
| KCNJ2    | Potassium inwardly-rectifying channel, subfamily J,    | 1.95 | 2.04E-03 |
| RAB23    | RAB23, member RAS oncogene family                      | 1.95 | 1.67E-02 |
| MORN     | MORN repeat containing 2                               | 1.90 | 6.00E-03 |
| PXK      | PX domain containing serine/threonine kinase           | 1.90 | 1.77E-05 |
| DUSP1    | Dual specificity phosphatase 19                        | 1.89 | 2.54E-03 |
| ITGA1    | Integrin, alpha 1                                      | 1.89 | 2.97E-02 |
| BANF1    | Barrier to autointegration factor 1                    | 1.88 | 3.72E-02 |
| ARHGE    | Cdc42 guanine nucleotide exchange factor (GEF)         | 1.88 | 1.30E-02 |
| JUN      | Jun oncogene                                           | 1.88 | 3.90E-02 |
| ZNF27    | Zinc finger protein 271                                | 1.88 | 5.42E-04 |
| CCDC11   | Coiled-coil domain containing 111                      | 1.87 | 3.12E-03 |
| GBE1     | Glucan (1,4-alpha-), branching enzyme 1                | 1.87 | 1.06E-02 |
| TAF1B    | TATA box binding protein (TBP)-associated factor,      | 1.86 | 5.89E-03 |
| C3orf62  | Chromosome 3 open reading frame 62                     | 1.86 | 2.14E-03 |
| CALM2    | Calmodulin 2                                           | 1.86 | 5.11E-03 |
| SDCCAG   | Serologically defined colon cancer antigen 10          | 1.86 | 3.49E-02 |
| MAP1LC   | Microtubule-associated protein 1 light chain 3         | 1.85 | 5.66E-03 |
| GTF2H    | General transcription factor IIH, polypeptide 5        | 1.85 | 1.80E-02 |
| BBS7     | Bardet-Biedl syndrome 7                                | 1.85 | 2.19E-02 |
| TTC35    | Tetratricopeptide repeat domain 35                     | 1.84 | 1.63E-02 |
| LETM2    | Leucine zipper-EF-hand containing transmembrane        | 1.84 | 1.28E-02 |
| HIST1H   | Histone cluster 1, H1b                                 | 1.84 | 5.43E-03 |
| COPZ2    | Coatamer protein complex, subunit zeta 2               | 1.84 | 1.50E-02 |
| E2F6     | E2F transcription factor 6                             | 1.83 | 1.75E-02 |
| ETFDH    | Electron-transferring-flavoprotein                     | 1.83 | 3.26E-02 |
| HLTF     | Helicase-like transcription factor                     | 1.83 | 5.59E-03 |
| ANKRD    | Ankyrin repeat domain 50                               | 1.82 | 6.77E-03 |
| HIST1H2  | Histone cluster 1, H2bb                                | 1.81 | 1.63E-04 |
| SNX24    | Sorting nexin 24                                       | 1.81 | 1.42E-06 |
| ANKRD    | Ankyrin repeat domain 28                               | 1.81 | 1.62E-02 |
| C10orf5  | Chromosome 10 open reading frame 55                    | 1.81 | 8.04E-06 |
| -        |                                                        |      |          |
| RNASE3   | Ribonuclease, RNase A family, 3                        | 1.80 | 3.74E-03 |
| FERMT2   | Fermitin family homolog 2                              | 1.79 | 2.88E-03 |
| C1orf103 | Chromosome 1 open reading frame 103                    | 1.79 | 2.15E-03 |
| FLJ42957 | FLJ42957 protein                                       | 1.79 | 3.04E-03 |
| MAP3K13  | Mitogen-activated protein kinase kinase kinase 13      | 1.79 | 3.32E-03 |
| MT1X     | Metallothionein 1X                                     | 1.79 | 3.48E-03 |
| ANO10    | Anoctamin 10                                           | 1.78 | 5.74E-03 |
| CCDC99   | Coiled-coil domain containing 99                       | 1.78 | 1.05E-03 |
| MTBP     | Mdm2-binding protein                                   | 1.77 | 3.43E-03 |
| ZNF714   | Zinc finger protein 714                                | 1.77 | 3.20E-03 |
| TOMM20   | Translocase of outer mitochondrial membrane 20 homolog | 1.77 | 3.09E-03 |

|        |                                                      |      |        |
|--------|------------------------------------------------------|------|--------|
| SEPT7  | Septin 7                                             | 1.77 | 9.59E- |
| ZFP112 | Zinc finger protein 112 homolog                      | 1.76 | 4.69E- |
| PAM    | Peptidylglycine alpha-amidating monooxygenase        | 1.76 | 8.87E- |
| BTD    | Biotinidase                                          | 1.75 | 7.34E- |
| UBXN2A | UBX domain protein 2A                                | 1.75 | 2.45E- |
| CCR1   | Chemokine (C-C motif) receptor 1                     | 1.75 | 2.46E- |
| CT45A2 | cancer/testis antigen family 45 member A2            | 1.75 | 1.78E- |
| SCML2  | Sex comb on midleg-like 2                            | 1.75 | 2.12E- |
| COPS4  | COP9 constitutive photomorphogenic homolog subunit 4 | 1.74 | 8.49E- |
| AP3S1  | Adaptor-related protein complex 3, sigma 1 subunit   | 1.74 | 4.73E- |
| AKT3   | v-akt murine thymoma viral oncogene homolog 3        | 1.74 | 4.00E- |

**Table 2.** Information of top 100 genes up-regulation in the CR cells. The average fold change and *p*-value were listed.

| Gene Symbol  | Gene Name                                                   | Fold change | <i>p</i> -Value |
|--------------|-------------------------------------------------------------|-------------|-----------------|
| AQP3         | Aquaporin 3                                                 | -3.99       | 3.04E-02        |
| NPHS1        | Nephrosis 1                                                 | -3.57       | 3.16E-02        |
| LAPTM5       | Lysosomal multispinning membrane protein 5                  | -3.26       | 3.88E-04        |
| OR52I2       | Olfactory receptor, family 52, subfamily I, member 2        | -3.19       | 2.16E-02        |
| FCER1A       | Fc fragment of IgE, high affinity I, receptor for alpha     | -3.07       | 2.46E-02        |
| OR51B4       | Olfactory receptor, family 51, subfamily B, member 4        | -2.94       | 2.10E-02        |
| TCEAL6       | Transcription elongation factor A (SII)-like 6              | -2.71       | 5.12E-03        |
| KRTAP5-6     | Keratin associated protein 5-6                              | -2.69       | 2.06E-02        |
| FAM10A4      | Family with sequence similarity 10, member A4               | -2.68       | 5.27E-03        |
| MTRF1L       | Mitochondrial translational release factor 1-like           | -2.63       | 1.11E-02        |
| CYP24A1      | Cytochrome P450, family 24, subfamily A, polypeptide        | -2.59       | 2.12E-02        |
| SHISA2       | Shisa homolog 2                                             | -2.52       | 1.24E-02        |
| DKFZP434P211 | POM121 membrane glycoprotein-like 1 pseudogene              | -2.51       | 3.31E-02        |
| SUSD2        | Sushi domain containing 2                                   | -2.48       | 1.04E-02        |
| BMP7         | Bone morphogenetic protein 7                                | -2.45       | 2.38E-03        |
| MMP1         | Matrix metalloproteinase 1                                  | -2.35       | 1.81E-02        |
| IFITM1       | Interferon induced transmembrane protein 1                  | -2.28       | 4.11E-02        |
| TSSK1B       | Testis-specific serine kinase 1B                            | -2.27       | 7.02E-03        |
| C10orf91     | Chromosome 10 open reading frame 91                         | -2.25       | 2.14E-02        |
| OR5M3        | Olfactory receptor, family 5, subfamily M, member 3         | -2.22       | 2.09E-02        |
| FKBP9        | FK506 binding protein 9, 63 kDa                             | -2.22       | 3.02E-02        |
| BRD7P3       | Bromodomain containing 7 pseudogene 3                       | -2.19       | 1.49E-02        |
| SERP2        | Stress-associated endoplasmic reticulum protein family      | -2.19       | 4.59E-02        |
| CYP2F1       | Cytochrome P450, family 2, subfamily F, polypeptide 1       | -2.18       | 6.68E-05        |
| C1orf180     | Chromosome 1 open reading frame 180                         | -2.12       | 7.81E-03        |
| ATP5E        | ATP synthase, H <sup>+</sup> transporting, mitochondrial F1 | -2.12       | 1.58E-03        |
| HSD11B1      | Hydroxysteroid (11-beta) dehydrogenase 1                    | -2.08       | 4.35E-02        |
| WASH3P       | WAS protein family homolog 3 pseudogene                     | -2.07       | 1.33E-02        |
| DDIT4        | DNA-damage-inducible transcript 4                           | -2.04       | 1.39E-04        |
| EYA2         | Eyes absent homolog 2 (Drosophila)                          | -2.04       | 1.07E-02        |
| SYT16        | Synaptotagmin XVI                                           | -2.02       | 2.19E-02        |
| C10orf58     | Chromosome 10 open reading frame 58                         | -2.01       | 1.78E-02        |
| NLRP2        | NLR family, pyrin domain containing 2                       | -2.01       | 9.17E-06        |
| PRSS35       | Protease, serine, 35                                        | -2.00       | 2.05E-03        |
| CYGB         | Cytoglobin                                                  | -1.98       | 3.69E-02        |
| PDHA2        | Pyruvate dehydrogenase (lipoamide) alpha 2                  | -1.98       | 8.61E-03        |
| OR10H3       | Olfactory receptor, family 10, subfamily H, member 3        | -1.97       | 4.34E-02        |
| S100A9       | S100 calcium binding protein A9                             | -1.97       | 4.44E-02        |
| LENEP        | Lens epithelial protein                                     | -1.97       | 2.85E-02        |
| GPR119       | G protein-coupled receptor 119                              | -1.96       | 4.45E-03        |
| ROR2         | Receptor tyrosine kinase-like orphan receptor 2             | -1.95       | 1.83E-02        |
| OR2C1        | Olfactory receptor, family 2, subfamily C, member 1         | -1.94       | 1.80E-03        |

|              |                                                          |       |          |
|--------------|----------------------------------------------------------|-------|----------|
| IL17B        | Interleukin 17B                                          | -1.93 | 3.01E-02 |
| METTL7A      | Methyltransferase like 7A                                | -1.92 | 1.11E-02 |
| TRGV3        | T cell receptor gamma variable 3                         | -1.92 | 2.10E-02 |
| ACP5         | Acid phosphatase 5, tartrate resistant                   | -1.92 | 1.98E-02 |
| IFNA21       | Interferon, alpha 21                                     | -1.91 | 1.72E-02 |
| FBXO25       | F-box protein 25                                         | -1.90 | 6.34E-03 |
| LEFTY1       | Left-right determination factor 1                        | -1.90 | 1.85E-02 |
| C6orf25      | Chromosome 6 open reading frame 25                       | -1.89 | 6.85E-03 |
| OR13J1       | Olfactory receptor, family 13, subfamily J, member 1     | -1.89 | 2.47E-02 |
| KRTAP21-2    | Keratin associated protein 21-2                          | -1.88 | 3.06E-02 |
| CMPK2        | Cytidine monophosphate (UMP-CMP) kinase 2, mitochondrial | -1.88 | 2.28E-02 |
| OR2B6        | Olfactory receptor, family 2, subfamily B, member 6      | -1.88 | 4.48E-03 |
| PAK6         | p21 protein (Cdc42/Rac)-activated kinase 6               | -1.84 | 1.18E-02 |
| UBXN10       | UBX domain protein 10                                    | -1.83 | 2.12E-02 |
| IL13         | Interleukin 13                                           | -1.83 | 4.78E-02 |
| FAM136A      | Family with sequence similarity 136, member A            | -1.82 | 2.71E-02 |
| BVES         | Blood vessel epicardial substance                        | -1.82 | 1.31E-02 |
| TNP1         | Transition protein 1                                     | -1.81 | 1.05E-02 |
| DEFB123      | Defensin, beta 123                                       | -1.81 | 1.52E-02 |
| KRT16        | Keratin 16                                               | -1.80 | 1.47E-03 |
| NEU4         | Sialidase 4                                              | -1.80 | 3.66E-03 |
| GPR148       | G protein-coupled receptor 148                           | -1.80 | 1.64E-02 |
| SLC6A10P     | Solute carrier family 6                                  | -1.79 | 2.01E-02 |
| TNFSF9       | Tumor necrosis factor (ligand) superfamily, member 9     | -1.79 | 1.42E-04 |
| CLCNKB       | Chloride channel Kb                                      | -1.79 | 1.13E-02 |
| PSORS1C2     | Psoriasis susceptibility 1 candidate 2                   | -1.78 | 1.35E-03 |
| ABHD9        | Abhydrolase domain containing 9                          | -1.78 | 4.70E-02 |
| TMEM22       | Transmembrane protein 22                                 | -1.77 | 2.64E-02 |
| PXT1         | Peroxisomal, testis specific 1                           | -1.77 | 2.30E-03 |
| SDR16C5      | Short chain dehydrogenase reductase family 16C, member 5 | -1.77 | 3.04E-05 |
| OR10H1       | Olfactory receptor, family 10, subfamily H, member 1     | -1.76 | 1.08E-02 |
| FGF23        | Fibroblast growth factor 23                              | -1.76 | 4.11E-02 |
| LSDP5        | Lipid storage droplet protein 5                          | -1.76 | 3.66E-02 |
| CDH29        | Cadherin-like 29                                         | -1.75 | 2.38E-08 |
| SDR9C7       | Short chain dehydrogenase reductase family 9C, member 7  | -1.73 | 3.43E-02 |
| AGR2         | Anterior gradient homolog 2                              | -1.73 | 2.44E-02 |
| THBD         | Thrombomodulin                                           | -1.73 | 5.89E-03 |
| LOC554234    | Ribosomal protein L36a pseudogene                        | -1.73 | 1.50E-02 |
| C20orf173    | Chromosome 20 open reading frame                         | -1.73 | 1.58E-04 |
| LOC100129827 | Hypothetical protein LOC100129827                        | -1.73 | 4.24E-03 |
| UBL5         | Ubiquitin-like 5                                         | -1.73 | 3.34E-02 |
| NKX6-2       | NK6 homeobox 2                                           | -1.73 | 2.16E-03 |
| PROK2        | Prokineticin 2                                           | -1.73 | 3.77E-02 |
| KIR2DL1      | Killer cell immunoglobulin-like receptor, two domains, 1 | -1.73 | 6.42E-03 |
| FGF22        | Fibroblast growth factor 22                              | -1.73 | 3.05E-03 |
| FOXO3        | Forkhead box O3                                          | -1.72 | 3.72E-02 |
| PLA2G2D      | Phospholipase A2, group IID                              | -1.72 | 1.91E-02 |
| TLR9         | Toll-like receptor 9                                     | -1.72 | 1.61E-02 |
| TRPV6        | Transient receptor potential cation channel, subfamily V | -1.71 | 6.35E-03 |
| ABAT         | 4-aminobutyrate aminotransferase                         | -1.70 | 1.57E-03 |
| PLXNA4       | Plexin A4                                                | -1.70 | 2.95E-03 |
| TAC4         | Tachykinin 4 (hemokinin)                                 | -1.70 | 7.13E-04 |
| MYL7         | Myosin, light chain 7, regulatory                        | -1.70 | 4.32E-03 |
| IL1RN        | Interleukin 1 receptor antagonist                        | -1.70 | 2.70E-05 |
| RSPH10B      | Radial spoke head 10 homolog B (Chlamydomonas)           | -1.70 | 2.50E-02 |
| OR4K17       | Olfactory receptor, family 4, subfamily K, member 17     | -1.70 | 7.54E-03 |
| ZFP36        | Zinc finger protein 36, C3H type, homolog                | -1.70 | 4.76E-02 |
| PLA2G12A     | Phospholipase A2, group XIIA                             | -1.70 | 4.49E-02 |

Table 3. Gene ontology analysis of all CR-associated genes.

| GOTERM_BP_DIRECT Term                                                                       | Count (%)   | p-value  | Genes                                                                                                                                                                                                                                                                                                                                                                                                                                                             |
|---------------------------------------------------------------------------------------------|-------------|----------|-------------------------------------------------------------------------------------------------------------------------------------------------------------------------------------------------------------------------------------------------------------------------------------------------------------------------------------------------------------------------------------------------------------------------------------------------------------------|
| <b>Up-regulated</b>                                                                         |             |          |                                                                                                                                                                                                                                                                                                                                                                                                                                                                   |
| GO:0006355<br>Regulation of transcription, DNA-templated                                    | 48 (14.08%) | 7.89E-05 | ERC1, MECOM, PRDM8, RALGAPA1, SATB1, SUPT4H1, TAF1B, TBPL1, ZNF625-ZNF20, APBB2, CLOCK, CCDC59, GTF2H5, HLTF, HINT1, IFT57, KLHL31, LRIF1, KAT7, NOCT, NCOA1, NUP35, SCML2, SNAPC1, TGFBRAP1, ZNF112, ZNF138, ZNF175, ZNF221, ZNF224, ZNF227, ZNF254, ZNF26, ZNF329, ZNF35, ZNF417, ZNF45, ZNF502, ZNF510, ZNF558, ZNF675, ZNF714, ZNF722, ZNF773, ZNF804, ZNF841, FBXO5, NEK1, NUF2, SPC25, SENP5, ANAPC11, ANAPC13, CSNK1A1, CDC7, KATNA1, MAPRE3, NCAPG, SKA1, |
| GO:0051301<br>Cell division                                                                 | 17 (4.99%)  | 5.05E-04 | ANAPC13, CSNK1A1, CDC7, KATNA1, MAPRE3, NCAPG, SKA1,                                                                                                                                                                                                                                                                                                                                                                                                              |
| GO:0006893<br>Golgi to plasma membrane transport                                            | 4 (1.17%)   | 3.07E-03 | CCDC93, COMMD1, CHIC2, EXOC1                                                                                                                                                                                                                                                                                                                                                                                                                                      |
| GO:0006468<br>Protein phosphorylation                                                       | 18 (5.28%)  | 3.11E-03 | AKT3, BMP2K, CDC42BPA, LOC400927-CSNK1E, NEK1, PDK, TBCK, CAMK2D, CSNK1A1, EIF2AK2, ICK,                                                                                                                                                                                                                                                                                                                                                                          |
| GO:0015031<br>Protein transport                                                             | 16 (4.69%)  | 4.56E-03 | BBS4, BBS7, ERC1, RAB23, PAB7A, ATG7, COPZ2, CCDC93, COMMD1, ECT2, EXOC1, SCFD2, SNX24, SPIRE1, STXBP5.                                                                                                                                                                                                                                                                                                                                                           |
| GO:0007067<br>Mitotic nuclear division                                                      | 12 (3.53%)  | 4.65E-03 | FBXO5, NEK1, NUF2, SPC25, ANAPC11, ANAPC13, CSNK1A1, KATNA1, MAPRE3, SKA1, STAG1, TXNL4A                                                                                                                                                                                                                                                                                                                                                                          |
| GO:0042384<br>Cilium assembly                                                               | 8 (2.35%)   | 6.43E-03 | ARL13B, BBS4, BBS7, NEK1, RAB23, ICK, IFT57,                                                                                                                                                                                                                                                                                                                                                                                                                      |
| GO:0060271<br>Cilium morphogenesis                                                          | 8 (2.35%)   | 1.04E-02 | ARL13B, BBS4, BBS7, NEK1, RAB23, HSPB11, ICK,                                                                                                                                                                                                                                                                                                                                                                                                                     |
| GO:0007264<br>Small GTPase mediated signal                                                  | 11 (3.23%)  | 1.22E-02 | ARL13B, DNAJC27, RAB23, RAB28, RAB7A, RAP1B, RALGPS2, RAP1GDS1, RHEB,                                                                                                                                                                                                                                                                                                                                                                                             |
| GO:0055119<br>Relaxation of cardiac muscle                                                  | 3 (0.88%)   | 1.82E-02 | CAMK2D, KCNJ2, SLC8A1                                                                                                                                                                                                                                                                                                                                                                                                                                             |
| <b>Down-regulated</b>                                                                       |             |          |                                                                                                                                                                                                                                                                                                                                                                                                                                                                   |
| GO:0007275<br>Multicellular organism                                                        | 23 (7.64%)  | 2.27E-06 | ELF3, EYA2, TNFRSF4, WNT8A, CDX2, FOXA3, FZD10, GALR2, GGNBP1, HILS1, HOXB1, HIVEP3, LENEPI, NOTCH1, PRRX2, ROR2, SFRP2, SHISA2, TSSK1B, THEC, TYNRP3, TNIP1, IJPK2                                                                                                                                                                                                                                                                                               |
| GO:0007186<br>G-protein coupled receptor signaling                                          | 29 (9.63%)  | 3.06E-05 | GNG8, GPBAR1, GPR119, GPR148, GPR174, F2R, FZD10, NMBR, OR1B1, OR13J1, OR2AE1, OR2B6, OR2C1, OR2T12, OR3A2, ORD4D10, ORD4K17,                                                                                                                                                                                                                                                                                                                                     |
|                                                                                             |             |          | OR6F1, OR8I2, PROK2, PRLHR, RGS16, SFRP2, TAS2R3, TAS2R38, TAS2R40                                                                                                                                                                                                                                                                                                                                                                                                |
| GO:0001580<br>Detection of chemical stimulus involved in sensory perception of bitter taste | 6 (1.99%)   | 1.89E-04 | CST1, RTP2, RTP5, TAS2R3, TAS2R38, TAS2R40                                                                                                                                                                                                                                                                                                                                                                                                                        |
| GO:0050911<br>Detection of chemical stimulus involved in sensory perception of smell        | 17 (5.65%)  | 2.15E-04 | OR1B1, OR10H1, OR10H3, OR13F1, OR13J1, OR2AE1, OR2B6, OR2C1, OR2T12, OR3A2, ORD10, OR4K17, OR5M3, OR51D1, OR52I2, OR6F1, OR8I2                                                                                                                                                                                                                                                                                                                                    |

|                                                             |               |          |                                                                                   |
|-------------------------------------------------------------|---------------|----------|-----------------------------------------------------------------------------------|
| GO:0048754<br>Branching morphogenesis of an epithelial tube | 4<br>(1.33%)  | 3.49E-03 | BMP7, MMP14, NOTCH1, MYCN                                                         |
| GO:0071456<br>Cellular response to hypoxia                  | 6<br>(1.99%)  | 9.59E-03 | MPL, NDRG1, BMP7, FOXO3, HYOU1, PTGIS                                             |
| GO:0007588<br>Excretion                                     | 4<br>(1.33%)  | 1.33E-02 | NPHS1, AQP3, CLCNKA, SCNN1B                                                       |
| GO:0006954<br>Inflammatory response                         | 12<br>(3.99%) | 1.37E-02 | ELF3, NLRP2, S100A9, TNFRSF4, CHST4, F2R, IL13, IL17B, PLA2G2D, PROK2, TAC4, TLR9 |
| GO:0071354<br>Cellular response to IL-6                     | 3<br>(1.00%)  | 1.48E-02 | CAMP, FGF23, PTGIS                                                                |
| GO:0030324<br>Lung development                              | 5<br>(1.66)   | 1.93E-02 | CEBPA, HSD11B1, MMP14, NOTCH1, MYNC                                               |

**Table 4.** List of primers used in the present study.

| Gene   | Primer                        |
|--------|-------------------------------|
| KITLG  | F: TCAAGAGCCCAGAACCCAGGC      |
|        | R: CCATGGCTGCCAGTGTAGGC       |
| SPC25  | F: ACCTCCTGTCAGATGGCGGGA      |
|        | R: GCAGTCAGTACTTCCAATTCCTGCT  |
| KCNJ2  | F: GCATGGTGAAGCCACTGCCA       |
|        | R: TGTCAGGGGGCGTGTCCGTA       |
| HLTF   | F: TCCACCATTCTGGGAACAGCGA     |
|        | R: TTGGGGCGGGAGCTAGACAA       |
| RAB23  | F: CGAGGAGCCCAGGCTTGTGT       |
|        | R: CTGACCGGAGTGACTTCCACCAG    |
| MSRB3  | F: GGAAGCGGCTAACACCCCTGC      |
|        | R: CCGTGCCACTGCTATCCGCA       |
| RHEB   | F: ACTTGTAGACACAGCCGGGC       |
|        | R: CTTGTGAAGCTGCCCCGTCC       |
| ULBP1  | F: GCCCATGGACACGGCAGAGG       |
|        | R: TGTGCCTGGGCCAGAGAGG        |
| SATB1  | F: CAGCACACCACCCAGCCGTC       |
|        | R: GCACCGCGTTGCTCTCCTGT       |
| TPMT   | F: GCAAGACAAGTGGGTGAACGGCA    |
|        | R: CTGTGTCCCCGGTCTGCAAACC     |
| GPR160 | F: ACGTCAAACAAACCAGCCCC       |
|        | R: AGCTGTCAGGAAAACCTGGATAATGC |
| EVI1   | F: CAGGACTGGTGGGGCTGCAA       |
|        | R: GGGGCTGGTCTTGGCTTGTGG      |
| NDC80  | F: CCTCTCCATGCAGGAGTTAAG A    |
|        | R: GGTCCTCGGGTCTTGATTTTCT     |
| NUF2   | F: TGTTAAGCAATACAAACGCACAG    |
|        | R: TGCCTTTTCAATACCGTCGTG      |
| SPC24  | F: GCCTCCGCGACATAGAGG         |
|        | R: CCTGCTCCTTCGATTGAGA        |
